# Supplementary material
Source: Springer Nature journal article supplement (https://www.springermedizin.de/resource/supplementary/12879_2012_2114_MOESM1_ESM.pdf/9443674)

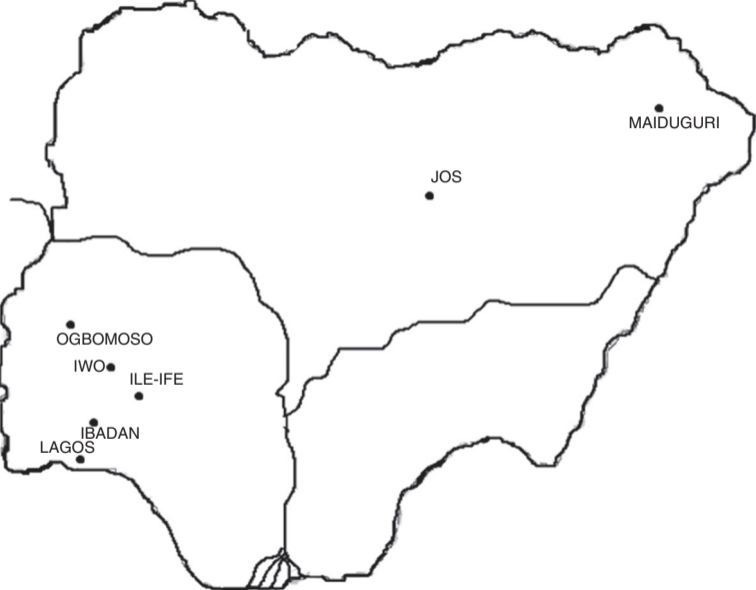

MAIDUGURI

JOS

OGBOMOSO

IWO

ILE-IFE

IBADAN

LAGOS

Supplement: MOESM1 [file 9443674]
